# Supplementary material for: RHCG Suppresses Tumorigenicity and Metastasis in Esophageal Squamous Cell Carcinoma via Inhibiting NF-κB Signaling and MMP1 Expression
Source: PubMed Central journal article supplement — Theranostics. 2018 Jan 1;8(1):185–98. doi: 10.7150/thno.21383 (PMC5743468; doi:10.7150/thno.21383), 2018-01-01
Supplement: thnov08p0185s1.pdf [file thnov08p0185s1.pdf]

## Supplemental data

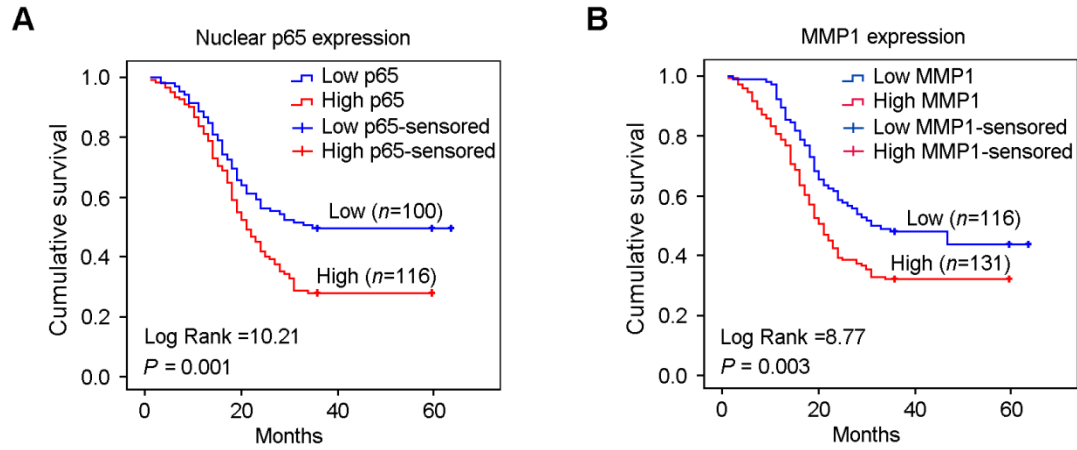

**Fig. S1.** Kaplan-Meier survival analysis comparing the overall survival time of ESCC patients with different nuclear p65 expression (A) or MMP1 expression (B) levels. Statistics: A and B, Kaplan-Meier analysis and log-rank test.

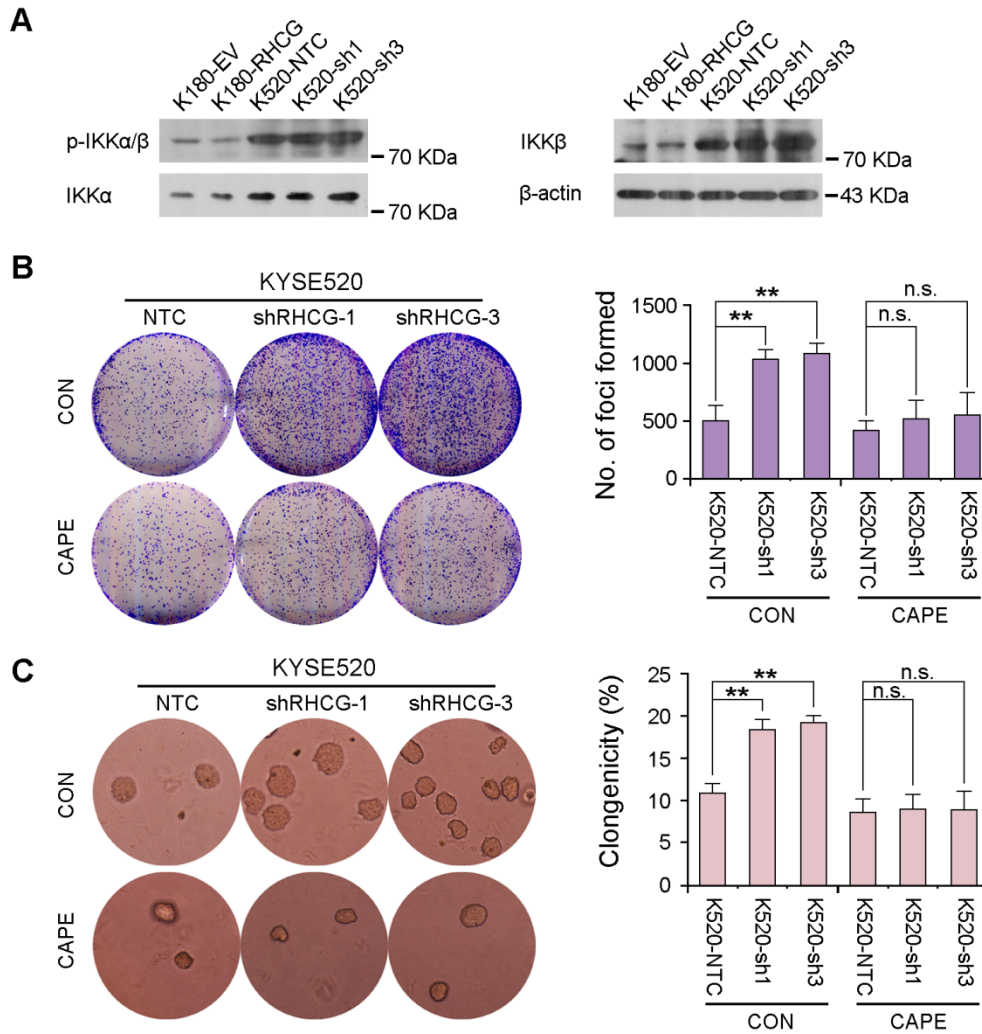

**Fig. S2. NF- $\kappa$ B inhibitor CAPE suppresses ESCC tumor formation.** (A) western blot analysis was used to detect total and phosphorylated IKK $\alpha$ / $\beta$  in indicated cells.  $\beta$ -actin was used as a loading control. (B-C) Representative images and summaries of foci formation (B) and soft agar assays (C) performed in *RHCG*-repressed cells and control cells treated with or without CAPE. The values indicate the mean  $\pm$  SD of three independent experiments. Statistics: B and C, Student *t* test. n.s.,  $P \geq 0.05$ ; \*\*,  $P < 0.001$ .

**Table S1.** List of deregulated genes in primary ESCC vs. matched non-tumor tissue (cut off > 2 folds).

| Gene Symbol                               | Probe set ID | Entrez Gene | Fold change (ESCC vs. non-tumor tissues) |        |      |        |
|-------------------------------------------|--------------|-------------|------------------------------------------|--------|------|--------|
|                                           |              |             | #301                                     | #327   | #351 | #363   |
| <b>Up-regulated genes in primary ESCC</b> |              |             |                                          |        |      |        |
| COL1A1                                    | 202310_s_at  | 1277        | 2.44                                     | 18.13  | 2.72 | 11.50  |
| COL1A1                                    | 202311_s_at  | 1277        | 6.81                                     | 47.81  | 3.19 | 26.98  |
| COL1A2                                    | 202404_s_at  | 1278        | 3.57                                     | 22.58  | 2.25 | 10.82  |
| FOXM1                                     | 202580_x_at  | 2305        | 5.47                                     | 2.71   | 2.10 | 3.93   |
| CCNA2                                     | 203418_at    | 890         | 8.14                                     | 4.41   | 2.12 | 3.67   |
| DLGAP5                                    | 203764_at    | 9787        | 33.10                                    | 6.60   | 2.34 | 6.57   |
| IGF2BP3                                   | 203819_s_at  | 10643       | 20.67                                    | 28.37  | 4.74 | 4.21   |
| IGF2BP3                                   | 203820_s_at  | 10643       | 31.73                                    | 31.97  | 5.13 | 3.91   |
| IFI6                                      | 204415_at    | 2537        | 2.68                                     | 4.85   | 2.28 | 4.29   |
| MMP1                                      | 204475_at    | 4312        | 101.99                                   | 296.87 | 2.01 | 729.27 |
| NEK2                                      | 204641_at    | 4751        | 27.81                                    | 10.00  | 2.17 | 3.65   |
| KIF23                                     | 204709_s_at  | 9493        | 11.73                                    | 7.48   | 2.38 | 3.24   |
| CENPA/SLC35F6                             | 204962_s_at  | 1058/54978  | 16.12                                    | 4.42   | 2.13 | 3.86   |
| MMP3                                      | 205828_at    | 4314        | 53.92                                    | 39.43  | 4.00 | 33.52  |
| CST1                                      | 206224_at    | 1469        | 81.01                                    | 17.62  | 4.12 | 42.72  |
| MDK                                       | 209035_at    | 4192        | 2.84                                     | 7.23   | 2.06 | 4.63   |
| SPP1                                      | 209875_s_at  | 6696        | 3.14                                     | 24.51  | 4.04 | 81.32  |
| HIST1H2BD                                 | 209911_x_at  | 3017        | 2.01                                     | 9.13   | 2.15 | 3.33   |
| MAGEA3                                    | 209942_x_at  | 4102        | 3.23                                     | 178.10 | 2.19 | 2.68   |
| FAP                                       | 209955_s_at  | 2191        | 2.06                                     | 6.66   | 2.37 | 4.90   |
| KIF2C                                     | 211519_s_at  | 11004       | 11.53                                    | 4.07   | 2.11 | 5.38   |
| KIAA1199                                  | 212942_s_at  | 57214       | 5.05                                     | 17.22  | 2.65 | 3.63   |
| OIP5                                      | 213599_at    | 11339       | 11.19                                    | 2.09   | 2.16 | 3.13   |
| IGF2BP3                                   | 216493_s_at  | 10643       | 2.36                                     | 2.02   | 3.89 | 4.30   |
| NCAPG                                     | 218663_at    | 64151       | 10.70                                    | 4.46   | 2.17 | 2.93   |
| NETO2                                     | 218888_s_at  | 81831       | 3.82                                     | 10.75  | 2.11 | 3.03   |
| RPP25                                     | 219143_s_at  | 54913       | 3.76                                     | 2.56   | 2.36 | 2.24   |
| SHCBP1                                    | 219493_at    | 79801       | 3.25                                     | 7.51   | 2.22 | 3.06   |
| ASPM                                      | 219918_s_at  | 259266      | 21.89                                    | 2.02   | 2.15 | 3.42   |
| EPB41L4B                                  | 220161_s_at  | 54566       | 11.06                                    | 2.75   | 2.15 | 5.71   |
| DEPDC1                                    | 220295_x_at  | 55635       | 13.72                                    | 6.42   | 2.30 | 6.29   |
| MCM10                                     | 220651_s_at  | 55388       | 8.90                                     | 2.56   | 2.09 | 7.29   |
| COL5A2                                    | 221729_at    | 1290        | 2.91                                     | 13.20  | 2.85 | 6.21   |
| COL5A2                                    | 221730_at    | 1290        | 2.42                                     | 9.63   | 2.79 | 7.46   |
| NETO2                                     | 222774_s_at  | 81831       | 3.17                                     | 8.17   | 2.72 | 5.26   |
| DEPDC1                                    | 222958_s_at  | 55635       | 19.90                                    | 8.78   | 2.04 | 6.45   |
| CDCA3                                     | 223307_at    | 83461       | 6.40                                     | 5.76   | 2.09 | 2.60   |
| CDCA7                                     | 224428_s_at  | 83879       | 10.56                                    | 5.48   | 2.14 | 3.32   |
| CTHRC1                                    | 225681_at    | 115908      | 6.90                                     | 89.21  | 2.55 | 20.25  |
| CCDC34                                    | 226287_at    | 91057       | 5.24                                     | 2.14   | 2.66 | 2.01   |
| FNDC1                                     | 226930_at    | 84624       | 3.73                                     | 9.23   | 5.10 | 5.86   |
| RHPN2                                     | 227196_at    | 85415       | 28.78                                    | 9.88   | 2.53 | 9.05   |
| ERP27                                     | 227450_at    | 121506      | 2.60                                     | 2.20   | 4.83 | 4.40   |
| SIX1                                      | 228347_at    | 6495        | 7.30                                     | 2.37   | 2.86 | 5.16   |
| COL1A2                                    | 229218_at    | 1278        | 2.61                                     | 24.84  | 2.39 | 5.58   |
| WISP1                                     | 229802_at    | 8840        | 4.71                                     | 20.69  | 2.48 | 10.74  |
| SHISA2                                    | 230493_at    | 387914      | 3.38                                     | 2.30   | 2.21 | 5.23   |
| DEPDC1                                    | 232278_s_at  | 55635       | 19.67                                    | 5.09   | 2.42 | 8.04   |
| COL3A1                                    | 232458_at    | 1281        | 2.34                                     | 23.40  | 2.20 | 6.05   |

|                                             |             |            |        |         |       |         |
|---------------------------------------------|-------------|------------|--------|---------|-------|---------|
| KIF14                                       | 236641_at   | 9928       | 13.86  | 2.74    | 2.02  | 2.54    |
| C11orf80                                    | 238593_at   | 79703      | 3.27   | 4.05    | 2.05  | 2.23    |
| RASEF                                       | 1553185_at  | 158158     | 8.68   | 7.79    | 2.29  | 8.06    |
| GPNMB                                       | 1554018_at  | 10457      | 2.46   | 4.78    | 2.05  | 2.19    |
| <b>Down-regulated genes in primary ESCC</b> |             |            |        |         |       |         |
| MYL9                                        | 201058_s_at | 10398      | -3.71  | -11.45  | -2.26 | -2.57   |
| EMP1                                        | 201325_s_at | 2012       | -2.77  | -13.83  | -2.21 | -7.33   |
| GPX3                                        | 201348_at   | 2878       | -5.87  | -3.30   | -3.92 | -7.15   |
| MYH11                                       | 201495_x_at | 4629       | -8.18  | -142.47 | -5.07 | -4.96   |
| MYH11                                       | 201496_x_at | 4629       | -6.97  | -244.28 | -3.53 | -11.85  |
| MYH11                                       | 201497_x_at | 4629       | -2.47  | -49.81  | -2.43 | -7.76   |
| FHL1                                        | 201539_s_at | 2273       | -5.66  | -88.56  | -3.56 | -13.61  |
| FHL1                                        | 201540_at   | 2273       | -2.88  | -18.82  | -2.51 | -11.84  |
| SFRP1                                       | 202036_s_at | 6422       | -6.80  | -10.76  | -2.64 | -9.96   |
| SFRP1                                       | 202037_s_at | 6422       | -10.36 | -12.39  | -2.53 | -29.23  |
| DES                                         | 202222_s_at | 1674       | -3.15  | -89.67  | -2.52 | -6.04   |
| ACTG2                                       | 202274_at   | 72         | -2.54  | -33.58  | -3.42 | -4.69   |
| MYLK                                        | 202555_s_at | 4638       | -2.19  | -6.15   | -2.35 | -2.35   |
| CRABP2                                      | 202575_at   | 1382       | -3.36  | -2.71   | -2.77 | -3.34   |
| C7                                          | 202992_at   | 730        | -4.65  | -86.74  | -8.29 | -35.96  |
| PTPRN2                                      | 203029_s_at | 5799       | -2.78  | -7.58   | -2.13 | -4.55   |
| ATP1A2                                      | 203296_s_at | 477        | -8.35  | -39.40  | -2.93 | -11.21  |
| F13A1                                       | 203305_at   | 2162       | -2.66  | -5.85   | -2.60 | -4.17   |
| PPL                                         | 203407_at   | 5493       | -2.77  | -5.87   | -2.29 | -8.15   |
| PLA2G2A                                     | 203649_s_at | 5320       | -4.10  | -11.04  | -4.27 | -51.57  |
| TMOD1                                       | 203661_s_at | 7111       | -3.44  | -4.49   | -2.18 | -2.43   |
| LMOD1                                       | 203766_s_at | 25802      | -4.33  | -34.70  | -2.07 | -6.80   |
| SLIT3                                       | 203813_s_at | 6586       | -3.17  | -4.23   | -2.29 | -3.86   |
| TSPAN8                                      | 203824_at   | 7103       | -2.09  | -79.61  | -3.59 | -15.51  |
| IGFBP6                                      | 203851_at   | 3489       | -5.29  | -2.83   | -4.30 | -5.42   |
| CNN1                                        | 203951_at   | 1264       | -4.36  | -41.00  | -3.07 | -5.17   |
| TPM2                                        | 204083_s_at | 7169       | -3.45  | -9.03   | -2.16 | -2.01   |
| PPP1R3C                                     | 204284_at   | 5507       | -2.79  | -8.16   | -4.07 | -11.39  |
| REEP1                                       | 204364_s_at | 65055      | -5.61  | -17.70  | -2.43 | -6.41   |
| LMO3                                        | 204424_s_at | 55885      | -4.45  | -22.54  | -2.83 | -3.76   |
| SNCA                                        | 204467_s_at | 6622       | -3.08  | -2.91   | -3.13 | -2.02   |
| SERPINB2                                    | 204614_at   | 5055       | -2.63  | -173.61 | -2.01 | -18.65  |
| TFF3                                        | 204623_at   | 7033       | -2.39  | -86.21  | -5.70 | -9.01   |
| TGFBR3                                      | 204731_at   | 7049       | -2.07  | -3.51   | -2.04 | -12.33  |
| IL11RA                                      | 204773_at   | 3590       | -3.94  | -2.58   | -2.03 | -3.88   |
| MAL                                         | 204777_s_at | 4118       | -3.55  | -321.54 | -9.78 | -318.87 |
| AOC3                                        | 204894_s_at | 8639       | -4.41  | -5.84   | -2.09 | -2.83   |
| PLN                                         | 204938_s_at | 5350       | -4.24  | -59.91  | -4.16 | -4.02   |
| PLN                                         | 204939_s_at | 5350       | -3.28  | -36.76  | -2.57 | -4.62   |
| PLN                                         | 204940_at   | 5350       | -3.91  | -34.06  | -2.30 | -4.70   |
| SPINK5                                      | 205185_at   | 11005      | -3.99  | -81.19  | -4.70 | -92.74  |
| CLEC3B/EXOSC7                               | 205200_at   | 7123/23016 | -14.19 | -26.37  | -2.03 | -41.82  |
| EPM2A                                       | 205231_s_at | 7957       | -3.24  | -5.44   | -2.31 | -2.40   |
| CLDN10                                      | 205328_at   | 9071       | -6.18  | -19.67  | -4.51 | -11.06  |
| AGTR1                                       | 205357_s_at | 185        | -10.48 | -2.53   | -2.94 | -2.79   |
| CFD                                         | 205382_s_at | 1675       | -12.40 | -20.38  | -4.02 | -20.28  |
| FXYD1                                       | 205384_at   | 5348       | -7.89  | -10.14  | -2.12 | -6.57   |
| DCLK1                                       | 205399_at   | 9201       | -6.18  | -4.74   | -2.38 | -8.75   |
| IL1R2                                       | 205403_at   | 7850       | -2.15  | -17.16  | -2.40 | -25.78  |
| BCHE                                        | 205433_at   | 590        | -5.46  | -86.77  | -3.76 | -34.11  |
| PCP4                                        | 205549_at   | 5121       | -4.31  | -95.54  | -3.09 | -19.93  |

|            |             |        |        |          |       |         |
|------------|-------------|--------|--------|----------|-------|---------|
| CDA        | 205627_at   | 978    | -4.87  | -2.10    | -2.21 | -7.45   |
| CTSG       | 205653_at   | 1511   | -4.17  | -9.15    | -2.00 | -6.63   |
| EREG       | 205767_at   | 2069   | -2.64  | -11.25   | -4.86 | -23.79  |
| FGF7       | 205782_at   | 2252   | -5.84  | -10.20   | -2.10 | -4.75   |
| ZBTB16     | 205883_at   | 7704   | -3.62  | -16.52   | -2.52 | -5.25   |
| TGM3       | 206004_at   | 7053   | -4.93  | -204.50  | -3.96 | -136.01 |
| TGM1       | 206008_at   | 7051   | -2.91  | -7.97    | -2.07 | -4.93   |
| ASPA       | 206030_at   | 443    | -7.45  | -14.60   | -2.16 | -10.25  |
| CILP       | 206227_at   | 8483   | -8.08  | -5.20    | -3.76 | -7.70   |
| USP9Y      | 206624_at   | 8287   | -3.51  | -2.37    | -3.21 | -3.20   |
| PDE5A      | 206757_at   | 8654   | -3.47  | -12.84   | -2.26 | -2.41   |
| SCEL       | 206884_s_at | 8796   | -2.81  | -186.31  | -4.52 | -20.56  |
| CDH19      | 206898_at   | 28513  | -4.54  | -12.08   | -2.86 | -3.43   |
| NCRNA00185 | 207063_at   | 55410  | -2.75  | -2.68    | -2.07 | -3.56   |
| CASQ2      | 207317_s_at | 845    | -4.50  | -20.72   | -2.85 | -10.54  |
| SMTN       | 207390_s_at | 6525   | -5.36  | -7.71    | -2.27 | -4.22   |
| TPSAB1     | 207741_x_at | 7177   | -3.67  | -7.70    | -2.06 | -6.76   |
| CRISP3     | 207802_at   | 10321  | -8.67  | -677.90  | -3.92 | -453.99 |
| KRT13      | 207935_s_at | 3860   | -2.20  | -1825.09 | -2.85 | -4.88   |
| MYH11      | 207961_x_at | 4629   | -2.88  | -46.38   | -2.42 | -5.17   |
| DPT        | 207977_s_at | 1805   | -12.02 | -14.72   | -2.68 | -9.19   |
| FAM107A    | 209074_s_at | 11170  | -16.92 | -30.31   | -2.44 | -18.87  |
| ECM1       | 209365_s_at | 1893   | -2.71  | -10.80   | -2.62 | -16.35  |
| SMTN       | 209427_at   | 6525   | -5.12  | -2.11    | -2.10 | -2.60   |
| ADH1B      | 209612_s_at | 125    | -23.77 | -136.03  | -3.98 | -261.97 |
| ADH1B      | 209613_s_at | 125    | -29.30 | -175.36  | -4.20 | -254.59 |
| ADH1B      | 209614_at   | 125    | -11.03 | -2.25    | -3.25 | -8.68   |
| NKX3-1     | 209706_at   | 4824   | -3.67  | -34.79   | -7.35 | -6.56   |
| CHRD1      | 209763_at   | 91851  | -4.97  | -47.77   | -3.05 | -23.77  |
| KCNMB1     | 209948_at   | 3779   | -4.42  | -41.94   | -2.67 | -3.50   |
| PLP1       | 210198_s_at | 5354   | -15.57 | -26.25   | -3.51 | -7.93   |
| FHL1       | 210298_x_at | 2273   | -5.00  | -74.56   | -3.03 | -14.34  |
| FHL1       | 210299_s_at | 2273   | -4.50  | -53.04   | -2.86 | -14.71  |
| TCEAL2     | 211276_at   | 140597 | -4.54  | -15.65   | -4.62 | -6.19   |
| IL1R2      | 211372_s_at | 7850   | -2.73  | -13.84   | -2.24 | -12.11  |
| FCER1A     | 211734_s_at | 2205   | -9.71  | -34.70   | -4.03 | -7.10   |
| PTN        | 211737_x_at | 5764   | -4.26  | -7.20    | -2.18 | -23.56  |
| MFAP4      | 212713_at   | 4239   | -7.66  | -12.60   | -2.21 | -10.59  |
| SYNM       | 212730_at   | 23336  | -3.00  | -37.03   | -2.34 | -10.64  |
| PRUNE2     | 212805_at   | 158471 | -2.79  | -36.65   | -2.01 | -2.69   |
| PRUNE2     | 212806_at   | 158471 | -3.56  | -12.87   | -2.11 | -2.89   |
| DPT        | 213068_at   | 1805   | -10.23 | -14.20   | -2.67 | -21.21  |
| DPT        | 213071_at   | 1805   | -10.60 | -10.99   | -3.45 | -13.36  |
| TNXA       | 213451_x_at | 7148   | -4.68  | -10.44   | -2.04 | -11.07  |
| MFAP5      | 213764_s_at | 8076   | -4.67  | -2.11    | -2.17 | -2.06   |
| MFAP5      | 213765_at   | 8076   | -4.95  | -3.12    | -2.53 | -2.78   |
| DES        | 214027_x_at | 1674   | -3.16  | -30.58   | -2.07 | -3.71   |
| GPX3       | 214091_s_at | 2878   | -6.93  | -3.36    | -3.29 | -7.86   |
| FHL1       | 214505_s_at | 2273   | -4.79  | -50.55   | -3.17 | -11.01  |
| SLURP1     | 214536_at   | 57152  | -3.59  | -9.79    | -2.02 | -26.58  |
| HSPB6      | 214767_s_at | 126393 | -5.13  | -7.22    | -2.26 | -2.42   |
| IL1RN      | 216244_at   | 3557   | -4.19  | -9.01    | -2.01 | -24.33  |
| MT1M       | 217546_at   | 4499   | -3.69  | -60.45   | -2.66 | -20.65  |
| C3         | 217767_at   | 718    | -2.18  | -2.30    | -2.21 | -7.25   |
| PHLDA1     | 217996_at   | 22822  | -2.31  | -2.19    | -2.04 | -3.18   |
| SORBS1     | 218087_s_at | 10580  | -4.45  | -33.33   | -2.79 | -9.23   |

|           |             |        |        |         |        |         |
|-----------|-------------|--------|--------|---------|--------|---------|
| OGN       | 218730_s_at | 4969   | -7.05  | -63.48  | -4.57  | -72.97  |
| LYVE1     | 219059_s_at | 10894  | -12.85 | -24.79  | -2.56  | -17.47  |
| TMEM100   | 219230_at   | 55273  | -6.11  | -12.59  | -4.20  | -26.38  |
| PCOLCE2   | 219295_s_at | 26577  | -5.03  | -9.60   | -4.64  | -22.71  |
| CLIC3     | 219529_at   | 9022   | -3.81  | -4.28   | -2.34  | -13.56  |
| RHCG      | 219554_at   | 51458  | -2.52  | -17.93  | -3.49  | -327.98 |
| TMEM35    | 219685_at   | 59353  | -6.05  | -10.12  | -3.95  | -3.11   |
| CLCA4     | 220026_at   | 22802  | -2.86  | -912.27 | -2.62  | -123.97 |
| LYVE1     | 220037_s_at | 10894  | -22.97 | -61.28  | -2.51  | -16.57  |
| CRNN      | 220090_at   | 49860  | -3.61  | -489.28 | -11.91 | -261.59 |
| FHL5      | 220170_at   | 9457   | -15.74 | -6.32   | -4.01  | -7.29   |
| RERGL     | 220276_at   | 79785  | -35.41 | -6.72   | -2.40  | -19.27  |
| ADAMTS9   | 220287_at   | 56999  | -2.75  | -3.63   | -2.22  | -4.57   |
| TMPRSS11E | 220431_at   | 28983  | -2.44  | -64.86  | -3.94  | -47.06  |
| CRCT1     | 220620_at   | 54544  | -4.24  | -21.33  | -5.39  | -73.20  |
| GREM2     | 220794_at   | 64388  | -8.42  | -17.98  | -2.77  | -10.33  |
| HSPB8     | 221667_s_at | 26353  | -4.59  | -3.69   | -2.28  | -7.83   |
| ADAMTS1   | 222162_s_at | 9510   | -9.03  | -17.95  | -2.05  | -7.99   |
| ADAMTS1   | 222486_s_at | 9510   | -12.33 | -19.59  | -2.14  | -5.94   |
| SORBS1    | 222513_s_at | 10580  | -3.75  | -12.99  | -2.13  | -3.66   |
| OGN       | 222722_at   | 4969   | -6.13  | -50.41  | -3.98  | -80.10  |
| TMEM40    | 222892_s_at | 55287  | -2.36  | -3.36   | -2.55  | -4.51   |
| RAB9B     | 222918_at   | 51209  | -8.11  | -10.18  | -3.33  | -9.09   |
| SLMAP     | 222924_at   | 7871   | -5.42  | -9.26   | -2.34  | -5.47   |
| C1orf21   | 223126_s_at | 81563  | -2.60  | -6.34   | -2.03  | -5.78   |
| C2orf40   | 223623_at   | 84417  | -13.64 | -63.70  | -2.06  | -34.56  |
| SPINK7    | 223720_at   | 84651  | -4.01  | -326.75 | -7.21  | -256.81 |
| CNFN      | 224329_s_at | 84518  | -2.83  | -2.99   | -4.34  | -135.09 |
| ANGPTL1   | 224339_s_at | 9068   | -9.19  | -14.13  | -3.05  | -12.87  |
| PDK4      | 225207_at   | 5166   | -10.20 | -248.03 | -2.18  | -40.60  |
| SYNPO2    | 225720_at   | 171024 | -5.74  | -143.24 | -2.73  | -11.38  |
| SYNPO2    | 225721_at   | 171024 | -4.68  | -41.90  | -2.48  | -8.06   |
| MSRB3     | 225782_at   | 253827 | -3.28  | -6.92   | -2.05  | -2.12   |
| CGNL1     | 225817_at   | 84952  | -3.47  | -3.22   | -2.09  | -10.08  |
| SYNPO2    | 225894_at   | 171024 | -8.11  | -49.88  | -3.14  | -8.59   |
| SYNPO2    | 225895_at   | 171024 | -4.88  | -127.87 | -2.58  | -12.88  |
| CAB39L    | 225915_at   | 81617  | -6.34  | -20.14  | -2.08  | -13.43  |
| STEAP4    | 225987_at   | 79689  | -6.10  | -16.48  | -3.09  | -24.38  |
| NEXN      | 226103_at   | 91624  | -3.13  | -10.64  | -2.06  | -2.07   |
| PGM5      | 226303_at   | 5239   | -6.65  | -76.02  | -2.48  | -16.10  |
| HSPB6     | 226304_at   | 126393 | -4.83  | -10.15  | -2.33  | -4.60   |
| MUSTN1    | 226856_at   | 389125 | -19.54 | -7.18   | -2.77  | -13.85  |
| NOSTRIN   | 226992_at   | 115677 | -3.77  | -7.19   | -2.03  | -3.00   |
| C11orf96  | 227099_s_at | 387763 | -4.03  | -2.20   | -2.15  | -5.90   |
| CELF2     | 227178_at   | 10659  | -2.95  | -5.69   | -2.11  | -4.64   |
| PLAC9     | 227419_x_at | 219348 | -5.46  | -13.95  | -2.48  | -8.66   |
| GFRA1     | 227550_at   | 2674   | -3.64  | -5.34   | -4.21  | -9.07   |
| SYNPO2    | 227662_at   | 171024 | -2.79  | -57.14  | -2.89  | -9.46   |
| NAP1L5    | 228062_at   | 266812 | -4.22  | -7.17   | -2.36  | -6.29   |
| NAP1L5    | 228063_s_at | 266812 | -3.41  | -4.87   | -2.15  | -9.03   |
| MYH11     | 228133_s_at | 4629   | -8.79  | -308.03 | -3.22  | -4.41   |
| SCN7A     | 228504_at   | 6332   | -4.12  | -39.57  | -3.98  | -28.62  |
| GCOM1     | 228568_at   | 145781 | -3.99  | -15.43  | -2.10  | -11.01  |
| CD36      | 228766_at   | 948    | -16.02 | -31.27  | -2.75  | -6.55   |
| MAMDC2    | 228885_at   | 256691 | -4.17  | -24.87  | -3.72  | -17.89  |
| MYOCD     | 229339_at   | 93649  | -4.87  | -38.66  | -2.78  | -7.15   |

|           |              |        |        |         |       |         |
|-----------|--------------|--------|--------|---------|-------|---------|
| NEGR1     | 229461_x_at  | 257194 | -7.20  | -30.40  | -3.00 | -8.46   |
| JPH2      | 229578_at    | 57158  | -2.99  | -7.75   | -2.21 | -2.16   |
| DCLK1     | 229800_at    | 9201   | -8.32  | -4.59   | -2.85 | -5.07   |
| SCARA5    | 229839_at    | 286133 | -19.04 | -11.43  | -3.44 | -26.07  |
| NFIA      | 229994_at    | 4774   | -7.77  | -10.48  | -2.31 | -2.79   |
| PGM5-AS1  | 230595_at    | 572558 | -9.28  | -23.50  | -4.60 | -26.41  |
| IGSF10    | 230670_at    | 285313 | -2.92  | -2.72   | -2.38 | -13.41  |
| SGCD      | 230730_at    | 6444   | -2.25  | -2.81   | -2.09 | -2.33   |
| DSTN      | 230933_at    | 11034  | -6.89  | -9.02   | -2.02 | -2.49   |
| KGFLP2    | 231031_at    | 654466 | -4.02  | -2.38   | -2.11 | -2.11   |
| ANGPTL1   | 231773_at    | 9068   | -8.38  | -28.72  | -3.17 | -9.67   |
| SCEL      | 232056_at    | 8796   | -2.89  | -186.90 | -4.54 | -20.85  |
| PRSS27    | 232074_at    | 83886  | -3.47  | -9.07   | -4.30 | -15.84  |
| SYNPO2    | 232119_at    | 171024 | -7.86  | -39.09  | -3.57 | -2.74   |
| MBNL1-AS1 | 232298_at    | 401093 | -2.99  | -25.22  | -3.26 | -2.15   |
| ANXA1     | 233011_at    | 301    | -12.74 | -39.80  | -2.64 | -38.12  |
| CDC37L1   | 235787_at    | 55664  | -2.74  | -3.75   | -2.60 | -2.24   |
| SCARA5    | 235849_at    | 286133 | -13.45 | -11.21  | -3.67 | -24.47  |
| KIAA1377  | 235956_at    | 57562  | -5.15  | -3.50   | -2.30 | -3.75   |
| SPG20     | 236600_at    | 23111  | -2.99  | -2.25   | -2.04 | -3.12   |
| MYOCD     | 237206_at    | 93649  | -5.24  | -45.73  | -3.33 | -6.66   |
| SSBP2     | 238484_s_at  | 23635  | -4.79  | -2.26   | -2.77 | -2.82   |
| VSIG10L   | 238654_at    | 147645 | -3.77  | -16.04  | -2.86 | -30.08  |
| ANGPTL1   | 239183_at    | 9068   | -12.51 | -5.65   | -3.77 | -6.35   |
| NEGR1     | 243357_at    | 257194 | -4.37  | -15.61  | -2.73 | -3.09   |
| SYNPO2    | 244108_at    | 171024 | -6.88  | -15.67  | -2.70 | -2.34   |
| KCNT2     | 244455_at    | 343450 | -2.01  | -2.45   | -2.00 | -2.91   |
| KRT78     | 1553212_at   | 196374 | -4.91  | -13.84  | -3.97 | -36.39  |
| KRT78     | 1553213_a_at | 196374 | -5.17  | -52.68  | -3.72 | -105.98 |
| SCEL      | 1554921_a_at | 8796   | -2.89  | -62.02  | -3.83 | -21.40  |
| FHL5      | 1555191_a_at | 9457   | -16.86 | -3.42   | -3.07 | -4.61   |
| RHOJ      | 1555234_a_at | 57381  | -2.23  | -2.23   | -2.17 | -2.32   |
| CAPN14    | 1557321_a_at | 440854 | -9.23  | -103.34 | -4.04 | -160.42 |
| A2ML1     | 1564307_a_at | 144568 | -3.45  | -15.17  | -2.70 | -45.82  |
| TMPRSS11B | 1560712_at   | 132724 | -4.46  | -586.57 | -4.24 | -679.72 |
| C9orf169  | 1569144_a_at | 375791 | -3.03  | -20.75  | -2.42 | -18.93  |

**Table S2.** Cox proportional hazard regression analysis for overall survival

| Clinicopathologic features                  | Univariable analysis |                  | Multivariable analysis |                  |
|---------------------------------------------|----------------------|------------------|------------------------|------------------|
|                                             | HR (95% CI)          | P-value          | HR (95% CI)            | P-value          |
| Gender (male vs. female)                    | 1.130 (0.855-1.495)  | 0.390            | 1.199 (0.878-1.636)    | 0.469            |
| Age (<60 vs. ≥60)                           | 1.009 (0.994-1.025)  | 0.227            | 1.119 (0.825-1.519)    | 0.253            |
| Differentiation<br>(well/moderate vs. poor) | 1.633 (1.210-2.225)  | <b>0.001</b>     | 1.310 (0.936-1.833)    | 0.115            |
| TNM stage (I/II vs. III/IV)                 | 2.365 (1.788-3.129)  | <b>&lt;0.001</b> | 1.971 (1.439-2.7)      | <b>&lt;0.001</b> |
| RHCG negative expression                    | 0.497 (0.366-0.676)  | <b>&lt;0.001</b> | 0.541 (0.395-0.743)    | <b>&lt;0.001</b> |

**Table S3.** List of deregulated genes in KYSE180-EV vs. KYSE180-RHCG cells (cut off > 1.5 folds).

| Gene                                      | Gene Name                                                    | Transcripts | Entrez    | Fold |
|-------------------------------------------|--------------------------------------------------------------|-------------|-----------|------|
| <b>Up-regulated genes in KYSE180-RHCG</b> |                                                              |             |           |      |
| ALDH1L2                                   | aldehyde dehydrogenase 1 family member L2                    | 16769481    | 160428    | 1.94 |
| ANKRD1                                    | ankyrin repeat domain 1                                      | 16716478    | 27063     | 1.98 |
| APOC1                                     | apolipoprotein C1                                            | 16863124    | 341       | 1.65 |
| ATP12A                                    | ATPase H+/K+ transporting non-gastric alpha 2 subunit        | 16773260    | 479       | 1.57 |
| BIRC3                                     | baculoviral IAP repeat containing 3                          | 16730522    | 330       | 1.63 |
| CA8                                       | carbonic anhydrase 8                                         | 17077525    | 767       | 1.58 |
| CAPNS2                                    | calpain, small subunit 2                                     | 16819099    | 84290     | 1.56 |
| CARD17                                    | caspase recruitment domain family member 17                  | 16743922    | 440068    | 1.68 |
| CASP14                                    | caspase 14                                                   | 16859090    | 23581     | 1.88 |
| CCDC80                                    | coiled-coil domain containing 80                             | 16957396    | 151887    | 1.62 |
| CCL2                                      | chemokine (C-C motif) ligand 2                               | 16833204    | 6347      | 1.64 |
| CD24                                      | CD24 molecule                                                | 17117110    | 100133941 | 1.54 |
| CXCL10                                    | chemokine (C-X-C motif) ligand 10                            | 16977052    | 3627      | 1.54 |
| CXCL14                                    | chemokine (C-X-C motif) ligand 14                            | 17000168    | 9547      | 1.60 |
| CYR61                                     | cysteine-rich angiogenic inducer 61                          | 16666738    | 3491      | 1.69 |
| DAPL1                                     | death associated protein-like 1                              | 16886806    | 92196     | 1.86 |
| DLX5                                      | distal-less homeobox 5                                       | 17060049    | 1749      | 1.52 |
| EGR1                                      | early growth response 1                                      | 16989736    | 1958      | 1.74 |
| EPB41L4A                                  | erythrocyte membrane protein band 4.1 like 4A                | 16998850    | 64097     | 1.82 |
| FAM171B                                   | family with sequence similarity 171 member B                 | 16888554    | 165215    | 1.57 |
| FGFR2                                     | fibroblast growth factor receptor 2                          | 16719025    | 2263      | 1.51 |
| FIGN                                      | fidgetin, microtubule severing factor                        | 16904410    | 55137     | 1.60 |
| FLT1                                      | fms related tyrosine kinase 1                                | 16780478    | 2321      | 1.56 |
| FOS                                       | Fos proto-oncogene, AP-1 transcription factor subunit        | 16786587    | 2353      | 1.63 |
| FREM2                                     | FRAS1 related extracellular matrix protein 2                 | 16774130    | 341640    | 1.64 |
| GPR135                                    | G protein-coupled receptor 135                               | 16793475    | 64582     | 1.51 |
| HERC5                                     | HECT and RLD domain containing E3 ubiquitin protein ligase 5 | 16968765    | 51191     | 1.56 |
| HMGCS1                                    | 3-hydroxy-3-methylglutaryl-CoA synthase 1                    | 16995890    | 3157      | 1.64 |
| HS3ST3B1                                  | heparan sulfate-glucosamine 3-O-sulfotransferase 3B1         | 16831306    | 9953      | 1.90 |
| ICAM1                                     | intercellular adhesion molecule 1                            | 16858137    | 3383      | 1.57 |
| IFI44L                                    | interferon-induced protein 44 like                           | 16666485    | 10964     | 1.50 |
| ITGA2                                     | integrin alpha 2                                             | 16984689    | 3672      | 1.51 |
| ITGB8                                     | integrin beta 8                                              | 17043982    | 3696      | 1.68 |
| IVNS1ABP                                  | influenza virus NS1A binding protein                         | 16697245    | 10625     | 1.66 |
| KIT                                       | KIT proto-oncogene receptor tyrosine kinase                  | 16966855    | 3815      | 1.71 |
| KRT1                                      | Keratin 1                                                    | 16765029    | 3848      | 2.77 |
| KRT10                                     | keratin 10                                                   | 16844477    | 3858      | 1.66 |
| LUZP2                                     | leucine zipper protein 2                                     | 16722987    | 338645    | 1.89 |
| MAP3K5                                    | mitogen-activated protein kinase kinase kinase 5             | 17024079    | 4217      | 1.51 |
| MPPED2                                    | metallophosphoesterase domain containing 2                   | 16736942    | 744       | 1.61 |



|                                             |                                                            |          |        |      |
|---------------------------------------------|------------------------------------------------------------|----------|--------|------|
| MSMO1                                       | methylsterol monooxygenase 1                               | 16972155 | 6307   | 1.58 |
| MT-TD                                       | mitochondrially encoded tRNA aspartic acid                 | 17100659 | 4555   | 1.96 |
| MT-TT                                       | mitochondrially encoded tRNA threonine                     | 17100685 | 4576   | 1.81 |
| MT-TW                                       | mitochondrially encoded tRNA tryptophan                    | 17100655 | 4578   | 1.52 |
| MX1                                         | MX dynamin like GTPase 1                                   | 16923031 | 4599   | 1.68 |
| NEDD9                                       | neural precursor cell expressed, developmentally down-     | 17118190 | 4739   | 1.76 |
| NPIP3                                       | nuclear pore complex interacting protein family member B3  | 17117684 | 23117  | 1.52 |
| OLR1                                        | oxidized low density lipoprotein (lectin-like) receptor 1  | 16761293 | 4973   | 1.90 |
| OR8G2                                       | olfactory receptor, family 8, subfamily G, member 2        | 16732840 | 26492  | 2.32 |
| PBX1                                        | PBX homeobox 1                                             | 16673191 | 5087   | 1.56 |
| PLXDC2                                      | Plexin domain containing 2                                 | 16703036 | 84898  | 2.71 |
| PTPRZ1                                      | protein tyrosine phosphatase, receptor-type Z1             | 17050847 | 5803   | 1.60 |
| RBMS3                                       | RNA binding motif, single stranded interacting protein 3   | 16938527 | 27303  | 1.93 |
| RHCG                                        | Rh family, C glycoprotein                                  | 16813112 | 51458  | 8.37 |
| SAMD5                                       | sterile alpha motif domain containing 5                    | 17013507 | 389432 | 1.69 |
| SEMA3C                                      | semadomain 3C                                              | 17059119 | 10512  | 1.53 |
| SEMA3D                                      | semadomain 3D                                              | 17059355 | 223117 | 2.11 |
| SLC16A12                                    | solute carrier family 16 member 12                         | 16716403 | 387700 | 1.53 |
| SLC1A3                                      | solute carrier family 1 member 3                           | 16984056 | 6507   | 1.71 |
| SLC25A27                                    | solute carrier family 25 member 27                         | 17009333 | 9481   | 1.59 |
| SLITRK5                                     | SLIT and NTRK like family member 5                         | 16775732 | 26050  | 1.61 |
| SMAD6                                       | SMAD family member 6                                       | 16802232 | 4091   | 2.11 |
| SNTB1                                       | syntrophin beta 1                                          | 17080630 | 6641   | 1.58 |
| SQLE                                        | squalene epoxidase                                         | 17072552 | 6713   | 1.60 |
| TAS2R19                                     | taste 2 receptor member 19                                 | 16761514 | 259294 | 1.61 |
| TAS2R30                                     | taste 2 receptor member 30                                 | 16761526 | 259293 | 2.28 |
| TGFBR2                                      | transforming growth factor beta receptor 2                 | 16938562 | 7048   | 1.63 |
| <b>Down-regulated genes in KYSE180-RHCG</b> |                                                            |          |        |      |
| ABCA1                                       | ATP binding cassette subfamily A member 1                  | 17096728 | 19     | 1.71 |
| ADH7                                        | alcohol dehydrogenase 7 (classIV), mu or sigma polypeptide | 16978261 | 131    | 1.54 |
| AKR7L                                       | aldo-keto reductase family 7 like                          | 16682671 | 246181 | 1.74 |
| ANKRD22                                     | ankyrin repeat domain 22                                   | 16716341 | 118932 | 1.53 |
| ANKRD29                                     | ankyrin repeat domain 29                                   | 16854301 | 147463 | 1.57 |
| ANXA10                                      | annexin A10                                                | 16972229 | 11199  | 2.90 |
| AREG                                        | amphiregulin                                               | 16967863 | 374    | 2.55 |
| ARHGDI3                                     | Rho GDP dissociation inhibitor (GDI) beta                  | 16761843 | 397    | 1.68 |
| CALB1                                       | calbindin 1                                                | 17078943 | 793    | 1.71 |
| CD68                                        | CD68 molecule                                              | 16830577 | 968    | 2.91 |
| CKMT1A                                      | creatine kinase, mitochondrial 1A                          | 16800242 | 548596 | 1.67 |
| DKK1                                        | dickkopf WNT signaling pathway inhibitor 1                 | 16705011 | 22943  | 1.51 |
| DSG3                                        | desmoglein 3                                               | 16851749 | 1830   | 1.63 |
| FAM72C                                      | family with sequence similarity 72 member C                | 16691883 | 554282 | 1.90 |
| FBN2                                        | fibrillin 2                                                | 16999475 | 2201   | 1.72 |
| FST                                         | follistatin                                                | 16984730 | 10468  | 1.65 |
| GAL                                         | galanin                                                    | 16728141 | 14419  | 2.57 |

|           |                                                   |          |        |      |
|-----------|---------------------------------------------------|----------|--------|------|
| GBP6      | guanylate binding protein family member 6         | 16666943 | 163351 | 1.60 |
| GLIPR1    | GLI pathogenesis related 1                        | 16754373 | 11010  | 1.62 |
| GTF3C6    | general transcription factor IIIC subunit 6       | 17011683 | 112495 | 1.51 |
| HAS3      | hyaluronan synthase 3                             | 16820528 | 3038   | 1.53 |
| HIST1H2BG | histonecluster 1 H2B family member g              | 17016390 | 8339   | 2.17 |
| HIST1H2BH | histone cluster1 H2B family member h              | 17005600 | 8345   | 1.56 |
| HIST1H2BJ | histonecluster 1 H2B family member j              | 17016451 | 8970   | 2.01 |
| HIST1H3C  | histone cluster 1 H3 family member c              | 17005539 | 8352   | 1.61 |
| HIST1H3H  | histone cluster 1 H3 family member h              | 17005862 | 8357   | 1.63 |
| HIST2H3D  | histone cluster 2 H3 family member d              | 16692614 | 653604 | 1.70 |
| IFI16     | interferon gamma inducible protein 16             | 16672390 | 3428   | 1.67 |
| IL1A      | interleukin 1 alpha                               | 16901974 | 3552   | 2.24 |
| KRT14     | keratin 14                                        | 16844804 | 3861   | 1.53 |
| KRT32     | keratin 32                                        | 16844702 | 3882   | 1.69 |
| KYNU      | kynureninase                                      | 16886174 | 8942   | 1.75 |
| LAMC2     | laminin subunit gamma 2                           | 16674845 | 3819   | 1.82 |
| LCP1      | lymphocyte cytosolic protein 1                    | 16778849 | 3936   | 1.72 |
| MFAP5     | microfibrillar associated protein 5               | 16760953 | 8076   | 1.71 |
| MMP1      | matrix metalloproteinase 1                        | 16743721 | 4312   | 1.58 |
| MRPS12    | mitochondrial ribosomal protein S12               | 16861907 | 6183   | 1.52 |
| NPR3      | natriuretic peptide receptor 3                    | 16983765 | 4883   | 1.71 |
| ODC1      | ornithine decarboxylase 1                         | 16894402 | 4953   | 1.52 |
| OR56A3    | olfactory receptor family 56 subfamily A member 3 | 16721320 | 390083 | 1.58 |
| PBDC1     | polysaccharide biosynthesis domain containing 1   | 17104983 | 51260  | 1.56 |
| PGAM4     | phosphoglycerate mutase family member 4           | 17112334 | 441531 | 1.52 |
| PLA2G4A   | phospholipase A2 group IVA                        | 16675197 | 5321   | 1.65 |
| PLIN3     | perilipin 3                                       | 16867414 | 10226  | 1.54 |
| PRPS1     | phosphoribosyl pyrophosphate synthetase 1         | 17106031 | 5631   | 1.54 |
| SERPINE1  | serpin family E member 1                          | 17049676 | 5054   | 1.76 |
| SERPINI1  | serpin family I member 1                          | 16947715 | 5274   | 1.63 |
| SFN       | stratifin                                         | 16661314 | 2810   | 1.85 |
| SGK1      | serum/glucocorticoid regulated kinase 1           | 17023810 | 6446   | 1.86 |
| SPRR3     | small proline-rich protein 3                      | 16671108 | 6707   | 1.52 |
| TAGLN     | transgelin                                        | 16731654 | 6876   | 1.89 |
| TMPRSS11E | transmembrane protease, serine 11E                | 16967327 | 28983  | 3.27 |
| TMPRSS15  | transmembrane protease, serine 15                 | 16924349 | 5651   | 1.59 |
| TNFRSF9   | TNF receptor superfamily member9                  | 16681288 | 3604   | 1.53 |
| UBASH3B   | ubiquitin associated and SH3 domain containing B  | 16732676 | 84959  | 1.51 |
| ZNF165    | zinc finger protein 165                           | 17005888 | 7718   | 1.53 |
| ZNF326    | zinc finger protein 326                           | 16667011 | 284695 | 1.59 |
| ZNF429    | zinc finger protein 429                           | 16860203 | 353088 | 1.52 |

**Table S4.** Association of nuclear p65 expression with clinicopathologic features in 216 primary ESCCs

| Features                    | Total | Nuclear p65 expression |            | P-value <sup>b</sup> |
|-----------------------------|-------|------------------------|------------|----------------------|
|                             |       | Low                    | High       |                      |
| Sex                         |       |                        |            |                      |
| Female                      | 92    | 48 (52.2%)             | 44 (47.8%) | 0.136                |
| Male                        | 124   | 52 (41.9%)             | 72 (58.1%) |                      |
| Age, years                  |       |                        |            |                      |
| <60                         | 116   | 47 (40.5%)             | 69 (59.5%) | 0.820                |
| ≥60                         | 100   | 39 (39%)               | 61 (61%)   |                      |
| Differentiation             |       |                        |            |                      |
| Well/moderate               | 161   | 74 (46%)               | 87 (54%)   | 0.866                |
| Poor                        | 55    | 26 (47.3%)             | 29 (52.7%) |                      |
| Invasion                    |       |                        |            |                      |
| Absent                      | 84    | 50 (59.5%)             | 34 (40.5%) | <b>0.002</b>         |
| Present                     | 132   | 50 (37.9%)             | 82 (62.1%) |                      |
| Clinical Stage <sup>a</sup> |       |                        |            |                      |
| Early stage I-II            | 155   | 90 (58.1%)             | 65 (41.9%) | <b>&lt;0.001</b>     |
| Advanced stage III-IV       | 61    | 10 (16.4%)             | 51 (83.6%) |                      |
| Lymph node metastasis       |       |                        |            |                      |
| Absent                      | 135   | 80 (59.3%)             | 55 (40.7%) | <b>&lt;0.001</b>     |
| Present                     | 81    | 20 (24.7%)             | 61 (75.3%) |                      |

<sup>a</sup>AJCC/UICC TNM staging system.

<sup>b</sup>Pearson  $\chi^2$  test.

**Table S5.** Association of MMP1 expression with clinicopathologic features in 247 primary ESCCs

| Features                          | Total | MMP1 expression |             | <i>P</i> -value <sup>b</sup> |
|-----------------------------------|-------|-----------------|-------------|------------------------------|
|                                   |       | Low             | High        |                              |
| <b>Sex</b>                        |       |                 |             |                              |
| Female                            | 108   | 53 (49.1%)      | 55 (50.9%)  | 0.558                        |
| Male                              | 139   | 63 (45.3%)      | 76 (54.7%)  |                              |
| <b>Age, years</b>                 |       |                 |             |                              |
| <60                               | 130   | 66 (50.8%)      | 64 (49.2%)  | 0.206                        |
| ≥60                               | 117   | 50 (42.7%)      | 67 (57.3%)  |                              |
| <b>Differentiation</b>            |       |                 |             |                              |
| Well/moderate                     | 186   | 81 (43.5%)      | 105 (56.5%) | 0.304                        |
| Poor                              | 61    | 22 (36.1%)      | 39 (63.9%)  |                              |
| <b>Invasion</b>                   |       |                 |             |                              |
| Absent                            | 90    | 52 (57.8%)      | 38 (42.2%)  | <b>0.010</b>                 |
| Present                           | 157   | 64 (40.8%)      | 93 (59.2%)  |                              |
| <b>Clinical Stage<sup>a</sup></b> |       |                 |             |                              |
| Early stage I-II                  | 165   | 92 (55.8%)      | 73 (44.2%)  | <b>&lt;0.001</b>             |
| Advanced stage III-IV             | 82    | 24 (29.3%)      | 58 (70.7%)  |                              |
| <b>Lymph node metastasis</b>      |       |                 |             |                              |
| Absent                            | 137   | 75 (54.7%)      | 62 (45.3%)  | <b>0.006</b>                 |
| Present                           | 110   | 41 (37.3%)      | 69 (62.7%)  |                              |

<sup>a</sup>AJCC/UICC TNM staging system.

<sup>b</sup>Pearson  $\chi^2$  test.

**Table S6.** List of PCR primers for expression and DNA methylation

| <b>Gene Name</b>                 | <b>Primer Sequence (5'-3')</b>                                                    |
|----------------------------------|-----------------------------------------------------------------------------------|
| <b>For Real-time PCR</b>         |                                                                                   |
| <i>RHCG</i><br>NM_016321.2       | Forward: TTCCAAGTGACCCTCTTCGC<br>Reverse: TAGGTTGCGTCGGTAGAGGA                    |
| <i>AREG</i><br>NM_001657         | Forward: GAGCCGACTATGACTACTCAGA<br>Reverse: TCACTTTCCGTCTTGTTTTGGG                |
| <i>IL1A</i><br>NM_000575         | Forward: TGGTAGTAGCAACCAACGGGA<br>Reverse: ACTTTGATTGAGGGCGTCATTC                 |
| <i>LAMC2</i><br>NM_018891        | Forward: TGGAGAACGCTGTGATAGGTG<br>Reverse: CAGGAGACCCATTTTCGTTGGA                 |
| <i>ABCA1</i><br>NM_005502        | Forward: ACATCCTGAAGCCAATCCTGA<br>Reverse: CTCCTGTGCGCATGTCCTCC                   |
| <i>MMP1</i><br>NM_002421         | Forward: GGGGCTTTGATGTACCCTAGC<br>Reverse: TGTCACACGCTTTTGGGGTTT                  |
| <i>CXCL10</i><br>NM_001565       | Forward: GTGGCATTCAAGGAGTACCTC<br>Reverse: TGATGGCCTTCGATTCTGGATT                 |
| <i>APOC1</i><br>NM_001645        | Forward: TCCAGTGCCTTGGATAAGCTG<br>Reverse: GGCTGATGAGTTCCCGAGC                    |
| <i>RBMS3</i><br>NM_001003793     | Forward: GGGGAACAGTTGAGTAAAACCA<br>Reverse: ACAATTTTCCATACGGTTGGCA                |
| <i>SMAD6</i><br>NM_001142861     | Forward: GCTACCAACTCCCTCATCACT<br>Reverse: CGTACACCGCATAGAGGCG                    |
| <i>EGR1</i><br>NM_001964         | Forward: GGTCAGTGGCCTAGTGAGC<br>Reverse: GTGCCGCTGAGTAAATGGGA                     |
| <i>GAPDH</i><br>NM_001256799     | Forward: GGAGCGAGATCCCTCCAAAAT<br>Reverse: GGCTGTTGTCATACTTCTCATGG                |
| <b>For full length cDNA</b>      |                                                                                   |
| <i>RHCG</i><br>NM_016321.2       | Forward: ccgctcgagATGGCCTGGAACACCAACCT<br>Reverse: tccccgcgCTAGGGTACCAAGGGTACCGAG |
| <b>For DNA methylation</b>       |                                                                                   |
| <i>RHCG</i> -BGS<br>-193 - +77   | Forward: AGAATTTGGGGTATTTTGATTTTTT<br>Reverse: CAAACCATACTACAAAATACCTAACC         |
| <i>RHCG</i> -MSP-M<br>-138 - +15 | Forward: TTGTTTTTTAGTTCGACGCG<br>Reverse: GACGAAACTTTTAAAACCCGAA                  |
| <i>RHCG</i> -MSP-U<br>-137 - +16 | Forward: TGTTTTTTAGTTTGATGTGG<br>Reverse: CAACAAAACCTTTTAAAACCCAAA                |

**Table S7.** List of antibodies used in this project

| <b>Antibody</b>                                   | <b>Vendor</b>  | <b>Cat No.</b> | <b>Application</b>   |
|---------------------------------------------------|----------------|----------------|----------------------|
| Rabbit anti-human RHCG                            | Sigma-Aldrich  | HPA043317      | WB 1:1000, IHC 1:100 |
| Mouse anti-human $\beta$ -actin                   | Abcam          | ab6276         | WB 1:5000            |
| Rabbit anti-human Histone H3                      | Abcam          | Ab8580         | WB 1:2000            |
| Mouse anti-human MMP1                             | Santa Cruz     | sc-58377       | WB 1:500, IHC 1:50   |
| Mouse anti-human NF- $\kappa$ B p65               | Santa Cruz     | sc-8008        | IF 1:100             |
| Rabbit anti-human IKK $\alpha$                    | Cell Signaling | #2682          | WB 1:1000            |
| Rabbit anti-human IKK $\beta$                     | Cell Signaling | #2678          | WB 1:1000            |
| Rabbit anti-human IKK $\alpha/\beta$ (Ser176/180) | Cell Signaling | #2697          | WB 1:1000            |
| Rabbit anti-human NF- $\kappa$ B p65              | Cell Signaling | #4764          | WB 1:1000            |
| Rabbit anti- human NF- $\kappa$ B p65 (Ser536)    | Cell Signaling | #3033          | WB 1:1000            |
| Mouse anti-human I $\kappa$ B- $\alpha$           | Cell Signaling | #4814          | WB 1:1000            |
| Rabbit anti-human I $\kappa$ B- $\alpha$ (Ser32)  | Cell Signaling | #2859          | WB 1:1000            |
| Goat anti-mouse IgG HRP antibody                  | Sigma-Aldrich  | A4416          | WB 1:5000            |
| Goat anti-rabbit IgG HRP antibody                 | Sigma-Aldrich  | A9169          | WB 1:5000            |
| CF <sup>TM</sup> goat anti-mouse IgG antibody     | Biotium        | 20030-1        | IF 1:5000            |

**Table S8.** The shRNA sequences for lentiviral transduction

| <b>Gene</b>                  | <b>shRNA Sequence</b>                                                             |
|------------------------------|-----------------------------------------------------------------------------------|
| <i>RHCG</i><br>(NM_016321.2) | TRCN0000059853:<br>CCGGCCAGCCTTGAAGTCTATGGAACCTCGAGTTCATAGACTTCA<br>AGGCTGGTTTTTG |
|                              | TRCN0000059856:<br>CCGGCCACTTCTTACAAGACCGCTACTCGAGTAGCGGTCTTGTA<br>GAAGTGGTTTTTG  |
| Non-Target<br>Control        | SHC002:<br>CCGGCAACAAGATGAAGAGCACAACCTCGAGTTGGTGCTCTTCAT<br>CTTGTTGTTTTT          |

## **Supplemental Methods**

### **RNA extraction and quantitative real-time PCR (qRT-PCR)**

Total RNA was extracted using TRIZOL Reagent (Invitrogen), and cDNA was synthesized using a reverse transcription (RT)-PCR Kit (Roche) according to the manufacturer's instructions. qRT-PCR was performed using the SYBR Green PCR Kit (Applied Biosystems) and an ABI PRISM 7900 Sequence Detector (Applied Biosystems). Specificity of primers was verified by dissociation curve analysis. Data were analyzed using ABI SDS v2.4 software (Applied Biosystems). All qRT-PCR reactions were performed in duplicates. Housekeeping gene GAPDH was used as an internal control. Using primers listed in Table S6.

### **5-aza-2'-deoxycytidine (5-aza-dC) and trichostatin A (TSA) treatment**

ESCC cell lines with absent/low RHCG expression (EC109, KYSE30, KYSE140 and KYSE180) were treated with 1-100  $\mu\text{mol/L}$  5-aza-dC, or 100-400  $\text{nmol/L}$  TSA (Sigma-Aldrich, St. Louis, MO) for 72 hours with a daily medium change.

### **Wound healing assay**

Cell mobility was studied by a scratch wound-healing assay. Briefly, cells were cultured in a 6-well plate until confluence. The culture medium was replaced by serum-free medium 24 h before wound creation. The cell layer was wounded using a sterile tip. After wounding, the medium was changed to fresh serum-free medium to remove cellular debris. Serial photographs were obtained at different time points.

### **Immunofluorescence**

Immunofluorescence (IF) was performed on ESCC cell lines. First, cells on the coverslips were fixed with 4% paraformaldehyde, and incubated with primary antibody (mouse anti-p65, 1:100 diluted; Santa Cruz) overnight at 4°C. After washing, cells underwent incubation with PE-

conjugated secondary antibodies for 1 hour, and subsequently counterstained with DAPI for 5 minutes at room temperature (Roche Diagnostics). All images were visualized under Carl Zeiss LSM700 fluorescence microscope (ZEISS, Germany) and analyzed using ZEN 2010 software.

### **Western blotting**

Quantified protein lysates were resolved on SDS-PAGE, transferred onto a polyvinylidenedifluoride (PVDF) membrane (Millipore), and then blocked with 5% non-fat milk in Tris-buffered saline-Tween 20 (TBS-T) for 1 hour at room temperature. The blocked membrane was then incubated with primary antibody at 4°C overnight. After washing with TBS-T, the membrane was incubated for 1 hour with horseradish peroxidase (HRP)-conjugated secondary antibody. A complex of primary and secondary antibodies labeled proteins were detected by enhanced chemiluminescence (ECL) system (GE Healthcare) and X-ray film (GE Healthcare).  $\beta$ -actin was used as a housekeeping control. Using antibodies listed in Table S7.

### ***RHCG* overexpression and knockdown**

The full-length wild-type *RHCG* cDNA (NM\_016321.2) was cloned into the pLenti6 expression vector (Invitrogen) and transfected into EC109 and KYSE180 cells with Lipofectamine 2000 Reagent (Invitrogen). Stable *RHCG*-expressing clones were selected for 2 weeks with Blasticidin (Sigma-Aldrich). Empty vector (EV)-transfected cells were used as controls. For *RHCG* knockdown, the scrambled shRNA plasmid (pLKO.1-NTC) and the *RHCG*-specific shRNA expression vectors (pLKO.1-sh*RHCG*) were purchased from Sigma-Aldrich. Two constructs against *RHCG* were used: sh*RHCG*-1 (TRCN0000059853) and sh*RHCG*-3 (TRCN0000059856). The shRNA sequences listed in Table S8. The pLKO.1-sh*RHCG* or the scrambled shRNA plasmid was transfected into KYSE520, and stable clones were selected using puromycin (Sigma-Aldrich).



## **Cell fractionation**

Cell fractionation was performed using the ReadyPrep™ Protein Extraction Kit (Cytoplasmic/Nuclear; Bio-Rad, #163-2089) according to manufacturer's instruction. The concentration of protein samples was determined by Plus One 2-D Quant Kit (GE Healthcare, Hatfield, Hertfordshire, UK).  $\beta$ -Actin and Histone H3 served as loading controls for cytoplasmic extract and nuclear extract, respectively.
